# Supplementary material for: How can we build and maintain the resilience of our health care professionals during COVID-19? Recommendations based on a scoping review
Source: HighWire-hosted journal article supplement (doi:10.1136/bmjopen-2020-043718), 2021-01-01
Supplement: bmjopen-2020-043718supp001_data_supplement.pdf [file bmjopen-2020-043718supp001_data_supplement.pdf]

## Online Appendix

### Table of contents

|                                                                                                                  |    |
|------------------------------------------------------------------------------------------------------------------|----|
| Search strategies .....                                                                                          | 1  |
| Table 1: Interventions/ recommendations prior to/ in run-up to the crisis: resilience .....                      | 8  |
| Table 2: Interventions/ recommendations during the crisis: resilience .....                                      | 11 |
| Table 3: Interventions/ recommendations during the crisis: tasks and responsibilities & working conditions ..... | 21 |

## Search strategies

### PubMed (January 1, 2003 through March 26, 2020)

| # | Search terms                                                                                                                                                                                                                                                                                                                                                                                                                                                                                                                                                                                                                                                                                                                                                                                                                                                                                                                                                                                                                                                                                                                                                                                                                                                                                                                                                                                        |
|---|-----------------------------------------------------------------------------------------------------------------------------------------------------------------------------------------------------------------------------------------------------------------------------------------------------------------------------------------------------------------------------------------------------------------------------------------------------------------------------------------------------------------------------------------------------------------------------------------------------------------------------------------------------------------------------------------------------------------------------------------------------------------------------------------------------------------------------------------------------------------------------------------------------------------------------------------------------------------------------------------------------------------------------------------------------------------------------------------------------------------------------------------------------------------------------------------------------------------------------------------------------------------------------------------------------------------------------------------------------------------------------------------------------|
| 1 | Medical Staff [MeSH] OR Physicians [MeSH] OR Nursing Staff [MeSH] OR Nurses [MeSH] OR Medical Staff [tiab] OR Physician* [tiab] OR Doctor* [tiab] OR Clinician* [tiab] OR Nursing Staff [tiab] OR Nurse* [tiab] OR Health care Worker* [tiab] OR Health Care Worker* [tiab] OR Health Worker* [tiab] OR Health care Professional* [tiab] OR Health Care Professional* [tiab] OR Health Professional* [tiab] OR Health care Provider* [tiab] OR Health Care Provider* [tiab] OR Health Provider* [tiab] OR Hospital worker* [tiab] OR Hospital Employee* [tiab] OR Medical House Staff [tiab]                                                                                                                                                                                                                                                                                                                                                                                                                                                                                                                                                                                                                                                                                                                                                                                                        |
| 2 | Disease Outbreaks [MeSH] OR Communicable Diseases, Emerging [MeSH] OR Severe Acute Respiratory Syndrome [MeSH] OR SARS Virus [MeSH] OR Middle East Respiratory Syndrome Coronavirus [MeSH] OR Ebolavirus [MeSH] OR Disease Outbreak* [tiab] OR Pandemic [tiab] OR Epidemic [tiab] OR Emerging Communicable Disease* [tiab] OR Emerging Infectious Disease* [tiab] OR Severe Acute Respiratory Syndrome [tiab] OR SARS [tiab] OR Middle East Respiratory Syndrome [tiab] OR MERS [tiab] OR Ebola* [tiab] OR Corona [tiab] OR Coronavirus [tiab] OR COVID-19 [tiab] OR 2019-nCoV [tiab] OR SARS-CoV [tiab] OR MERS-CoV [tiab] OR Sars-Cov-2 [tiab]                                                                                                                                                                                                                                                                                                                                                                                                                                                                                                                                                                                                                                                                                                                                                    |
| 3 | Resilience, Psychological [MeSH] OR Fatigue [MeSH] OR Workload [MeSH] OR Mental Health [MeSH] OR Burnout, Professional [MeSH] OR Occupational Health [MeSH] OR Occupational Stress [MeSH] OR Professionalism [MeSH] OR Psychological Trauma [MeSH] OR Fear [MeSH] OR Anxiety [MeSH] OR Adaptation, Psychological [MeSH] OR Resilience [tiab] OR Persever* [tiab] OR Physical Health [tiab] OR Physical Impact [tiab] OR Physical Effect* [tiab] OR Physical Outcome* [tiab] OR Physical Workload [tiab] OR Fatigue [tiab] OR Mental Health [tiab] OR Psychological Health [tiab] OR Emotional Health [tiab] OR Mental Impact [tiab] OR Psychological Impact [tiab] OR Emotional Impact [tiab] OR Mental Effect* [tiab] OR Psychological Effect* [tiab] OR Emotional Effect* [tiab] OR Mental Outcome* [tiab] OR Psychological Outcome* [tiab] OR Emotional Outcome* [tiab] OR Mental Workload [tiab] OR Psychological Workload [tiab] OR Emotional Workload [tiab] OR Wellbeing [tiab] OR Burnout [tiab] OR Burn-out [tiab] OR Occupational Health [tiab] OR Occupational Stress [tiab] OR Occupational Injury [tiab] OR Occupational Disability [tiab] OR Occupational Effect* [tiab] OR Professionalism [tiab] OR Trauma [tiab] OR Traumatic [tiab] OR Fear [tiab] OR Anxiety [tiab] OR Anxious [tiab] OR Stress [tiab] OR Distress [tiab] OR Adaptation [tiab] OR Coping [tiab] OR Stigma [tiab] |
| 4 | #1 AND #2 AND #3                                                                                                                                                                                                                                                                                                                                                                                                                                                                                                                                                                                                                                                                                                                                                                                                                                                                                                                                                                                                                                                                                                                                                                                                                                                                                                                                                                                    |

## Embase (January 1, 2003 through March 26, 2020)

| # | Search terms                                                                                                                                                                                                                                                                                                                                                                                                                                                                                                                                                                                                                                                                                                                                                                                                                                                                                                                                                                                                                                                                                                                                                                                                                                                                                                                                                                                                  |
|---|---------------------------------------------------------------------------------------------------------------------------------------------------------------------------------------------------------------------------------------------------------------------------------------------------------------------------------------------------------------------------------------------------------------------------------------------------------------------------------------------------------------------------------------------------------------------------------------------------------------------------------------------------------------------------------------------------------------------------------------------------------------------------------------------------------------------------------------------------------------------------------------------------------------------------------------------------------------------------------------------------------------------------------------------------------------------------------------------------------------------------------------------------------------------------------------------------------------------------------------------------------------------------------------------------------------------------------------------------------------------------------------------------------------|
| 1 | 'medical personnel'/exp OR 'medical staff'/exp OR 'hospital physician'/exp OR 'resident'/exp OR 'nurse'/exp OR 'medical staff':ab,ti OR Physician*:ab,ti OR Doctor*:ab,ti OR Clinician*:ab,ti OR 'Nursing Staff':ab,ti OR Nurse*:ab,ti OR 'Health care Worker*':ab,ti OR 'Health Care Worker*':ab,ti OR 'Health Worker*':ab,ti OR 'Health care Professional*':ab,ti OR 'Health Care Professional*':ab,ti OR 'Health Professional*':ab,ti OR 'Health care Provider*':ab,ti OR 'Health Care Provider*':ab,ti OR 'Health Provider*':ab,ti OR 'Hospital worker*':ab,ti OR 'Hospital Employee*':ab,ti OR 'Medical House Staff':ab,ti                                                                                                                                                                                                                                                                                                                                                                                                                                                                                                                                                                                                                                                                                                                                                                               |
| 2 | 'epidemic'/exp OR 'pandemic'/exp OR 'emerging infectious disease'/exp OR 'severe acute respiratory syndrome'/exp OR 'SARS-related coronavirus'/exp OR 'Middle East respiratory syndrome coronavirus'/exp OR 'Ebolavirus'/exp OR 'Disease Outbreak*':ab,ti OR Pandemic:ab,ti OR Epidemic:ab,ti OR 'Emerging Communicable Disease*':ab,ti OR 'Emerging Infectious Disease*':ab,ti OR 'Severe Acute Respiratory Syndrome':ab,ti OR SARS:ab,ti OR 'Middle East Respiratory Syndrome':ab,ti OR MERS:ab,ti OR Ebola*:ab,ti OR Corona:ab,ti OR Coronavirus:ab,ti OR 'COVID-19':ab,ti OR '2019-nCoV':ab,ti OR 'SARS-CoV':ab,ti OR 'MERS-CoV':ab,ti OR 'Sars-Cov-2':ab,ti                                                                                                                                                                                                                                                                                                                                                                                                                                                                                                                                                                                                                                                                                                                                              |
| 3 | 'resilience'/exp OR 'fatigue'/exp OR 'workload'/exp OR 'mental health'/exp OR 'psychological health'/exp OR 'emotional stability'/exp OR 'professional burnout'/exp OR 'occupational health'/exp OR 'job stress'/exp OR 'work capacity'/exp OR 'professionalism'/exp OR 'psychotrauma'/exp OR 'fear'/exp OR 'anxiety'/exp OR Resilience:ab,ti OR Persever*:ab,ti OR 'Physical Health':ab,ti OR 'Physical Impact':ab,ti OR 'Physical Effect*':ab,ti OR 'Physical Outcome*':ab,ti OR 'Physical Workload':ab,ti OR Fatigue:ab,ti OR 'Mental Health':ab,ti OR 'Psychological Health':ab,ti OR 'Emotional Health':ab,ti OR 'Mental Impact':ab,ti OR 'Psychological Impact':ab,ti OR 'Emotional Impact':ab,ti OR 'Mental Effect*':ab,ti OR 'Psychological Effect*':ab,ti OR 'Emotional Effect*':ab,ti OR 'Mental Outcome*':ab,ti OR 'Psychological Outcome*':ab,ti OR 'Emotional Outcome*':ab,ti OR 'Mental Workload':ab,ti OR 'Psychological Workload':ab,ti OR 'Emotional Workload':ab,ti OR Wellbeing:ab,ti OR Burnout:ab,ti OR Burn-out:ab,ti OR 'Occupational Health':ab,ti OR 'Occupational Stress':ab,ti OR 'Occupational Injury':ab,ti OR 'Occupational Disability':ab,ti OR 'Occupational Effect*':ab,ti OR Professionalism:ab,ti OR Trauma:ab,ti OR Traumatic:ab,ti OR Fear:ab,ti OR Anxiety:ab,ti OR Anxious:ab,ti OR Stress:ab,ti OR Distress:ab,ti OR Adaptation:ab,ti OR Coping:ab,ti OR Stigma:ab,ti |
| 4 | #1 AND #2 AND #3                                                                                                                                                                                                                                                                                                                                                                                                                                                                                                                                                                                                                                                                                                                                                                                                                                                                                                                                                                                                                                                                                                                                                                                                                                                                                                                                                                                              |

**PsycINFO (January 1, 2003 through March 26, 2020)**

| # | Search terms                                                                                                                                                                                                                                                                                                                                                                                                                                                                                                                                                                                                                                                                                                                                                                                                                                                                                                                                                                                                                                                                                                                                                                                                                                                                                                                                                                                                                                                                                                                                                                                                                                                                                                                                                                                                                       |
|---|------------------------------------------------------------------------------------------------------------------------------------------------------------------------------------------------------------------------------------------------------------------------------------------------------------------------------------------------------------------------------------------------------------------------------------------------------------------------------------------------------------------------------------------------------------------------------------------------------------------------------------------------------------------------------------------------------------------------------------------------------------------------------------------------------------------------------------------------------------------------------------------------------------------------------------------------------------------------------------------------------------------------------------------------------------------------------------------------------------------------------------------------------------------------------------------------------------------------------------------------------------------------------------------------------------------------------------------------------------------------------------------------------------------------------------------------------------------------------------------------------------------------------------------------------------------------------------------------------------------------------------------------------------------------------------------------------------------------------------------------------------------------------------------------------------------------------------|
| 1 | DE "Medical Personnel" OR DE "Nurses" OR DE "Physicians" OR DE "Psychiatric Hospital Staff" OR DE "Clinicians" OR TI "medical staff" OR TI "Physician" OR TI "Doctors" OR TI "Doctor" OR TI "Clinicians" OR TI "Clinician" OR TI "Nursing Staff" OR TI "Nurses" OR TI "Nurse" OR TI "Health care Professionals" OR TI "Health care Worker" OR TI "Health Care Professionals" OR TI "Health Care Worker" OR TI "Health Professionals" OR TI "Health Worker" OR TI "Health care Professionals" OR TI "Health care Professional" OR TI "Health Care Professionals" OR TI "Health Care Professional" OR TI "Health Professionals" OR TI "Health Professional" OR TI "Health care Providers" OR TI "Health care Provider" OR TI "Health Care Providers" OR TI "Health Care Provider" OR TI "Health Providers" OR TI "Health Provider" OR TI "Hospital professionals" OR TI "Hospital worker" OR TI "Hospital Employees" OR TI "Hospital Employee" OR TI "Medical House Staff" OR AB "medical staff" OR AB "Physician" OR AB "Doctors" OR AB "Doctor" OR AB "Clinicians" OR AB "Clinician" OR AB "Nursing Staff" OR AB "Nurses" OR AB "Nurse" OR AB "Health care Professionals" OR AB "Health care Worker" OR AB "Health Care Professionals" OR AB "Health Care Worker" OR AB "Health Professionals" OR AB "Health Worker" OR AB "Health care Professionals" OR AB "Health care Professional" OR AB "Health Care Professionals" OR AB "Health Care Professional" OR AB "Health Professionals" OR AB "Health Professional" OR AB "Health care Providers" OR AB "Health care Provider" OR AB "Health Care Providers" OR AB "Health Care Provider" OR AB "Health Providers" OR AB "Health Provider" OR AB "Hospital professionals" OR AB "Hospital worker" OR AB "Hospital Employees" OR AB "Hospital Employee" OR AB "Medical House Staff" |
| 2 | DE "Epidemics" OR DE "Pandemics" OR TI "Disease Outbreaks" OR TI "Pandemic" OR TI "Epidemic" OR TI "Emerging Communicable Diseases" OR TI "Emerging Infectious Diseases" OR TI "Severe Acute Respiratory Syndrome" OR TI "SARS" OR TI "Middle East Respiratory Syndrome" OR TI "MERS" OR TI "Ebola*" OR TI "Corona" OR TI "Coronavirus" OR TI "COVID-19" OR TI "2019-nCoV" OR TI "SARS-CoV" OR TI "MERS-CoV" OR TI "Sars-Cov-2" OR AB "Disease Outbreaks" OR AB "Pandemic" OR AB "Epidemic" OR AB "Emerging Communicable Diseases" OR AB "Emerging Infectious Diseases" OR AB "Severe Acute Respiratory Syndrome" OR AB "SARS" OR AB "Middle East Respiratory Syndrome" OR AB "MERS" OR AB "Ebola*" OR AB "Corona" OR AB "Coronavirus" OR AB "COVID-19" OR AB "2019-nCoV" OR AB "SARS-CoV" OR AB "MERS-CoV" OR AB "Sars-Cov-2"                                                                                                                                                                                                                                                                                                                                                                                                                                                                                                                                                                                                                                                                                                                                                                                                                                                                                                                                                                                                     |
| 3 | DE "Resilience (Psychological)" OR DE "Health Anxiety" OR DE "Mental Health" OR DE "Mental Status" OR DE "Occupational Health" OR DE "Work Related Illnesses" OR DE "Physical Health" OR DE "Well Being" OR DE "Compassion Fatigue" OR DE "Fatigue" DE "Health Outcomes" OR DE "Psychological Needs" OR DE "Physical Health" OR DE "Physical Strength" OR DE "Professionalism" OR DE "Trauma" OR DE "Emotional Trauma" OR DE "Injuries" OR DE "Post-Traumatic Stress" OR DE "Traumatic Loss" OR DE "Fear" OR DE "Anxiety" OR DE "Stress" OR DE "Environmental Stress" OR DE "Occupational Stress" OR DE "Physiological Stress" OR DE "Post-Traumatic Stress" OR DE "Psychological Stress" OR DE "Distress" OR                                                                                                                                                                                                                                                                                                                                                                                                                                                                                                                                                                                                                                                                                                                                                                                                                                                                                                                                                                                                                                                                                                                      |

|   |                                                                                                                                                                                                                                                                                                                                                                                                                                                                                                                                                                                                                                                                                                                                                                                                                                                                                                                                                                                                                                                                                                                                                                                                                                                                                                                                                                                                                                                                                                                                                                                                                                                                                                                                                                                                                                                                                                                                                                                |
|---|--------------------------------------------------------------------------------------------------------------------------------------------------------------------------------------------------------------------------------------------------------------------------------------------------------------------------------------------------------------------------------------------------------------------------------------------------------------------------------------------------------------------------------------------------------------------------------------------------------------------------------------------------------------------------------------------------------------------------------------------------------------------------------------------------------------------------------------------------------------------------------------------------------------------------------------------------------------------------------------------------------------------------------------------------------------------------------------------------------------------------------------------------------------------------------------------------------------------------------------------------------------------------------------------------------------------------------------------------------------------------------------------------------------------------------------------------------------------------------------------------------------------------------------------------------------------------------------------------------------------------------------------------------------------------------------------------------------------------------------------------------------------------------------------------------------------------------------------------------------------------------------------------------------------------------------------------------------------------------|
|   | <p>DE "Coping Behavior" OR DE "Adaptive Behavior" OR DE "Stigma" OR DE "Self-Stigma" OR TI "Resilience" OR TI "Persever*" OR TI "Physical Health" OR TI "Physical Impact" OR TI "Physical Effects" OR TI "Physical Outcomes" OR TI "Physical Workload" OR TI "Fatigue" OR TI "Mental Health" OR TI "Psychological Health" OR TI "Emotional Health" OR TI "Mental Impact" OR TI "Psychological Impact" OR TI "Emotional Impact" OR TI "Mental Effects" OR TI "Psychological Effects" OR TI "Emotional Effects" OR TI "Mental Outcomes" OR TI "Psychological Outcomes" OR TI "Emotional Outcomes" OR TI "Mental Workload" OR TI "Psychological Workload" OR TI "Emotional Workload" OR TI "Wellbeing" OR TI "Burnout" OR TI "Burn-out" OR TI "Occupational Health" OR TI "Occupational Injury" OR TI "Occupational Disability" OR TI "Occupational Effects" OR TI "Professionalism" OR TI "Trauma" OR TI "Traumatic" OR TI "Fear*" OR TI "Anxi*" OR TI "Stress" OR TI "Distress" OR TI "Adaptation" OR TI "Coping" OR TI "Stigma" OR AB "Resilience" OR AB "Persever*" OR AB "Physical Health" OR AB "Physical Impact" OR AB "Physical Effects" OR AB "Physical Outcomes" OR AB "Physical Workload" OR AB "Fatigue" OR AB "Mental Health" OR AB "Psychological Health" OR AB "Emotional Health" OR AB "Mental Impact" OR AB "Psychological Impact" OR AB "Emotional Impact" OR AB "Mental Effects" OR AB "Psychological Effects" OR AB "Emotional Effects" OR AB "Mental Outcomes" OR AB "Psychological Outcomes" OR AB "Emotional Outcomes" OR AB "Mental Workload" OR AB "Psychological Workload" OR AB "Emotional Workload" OR AB "Wellbeing" OR AB "Burnout" OR AB "Burn-out" OR AB "Occupational Health" OR AB "Occupational Injury" OR AB "Occupational Disability" OR AB "Occupational Effects" OR AB "Professionalism" OR AB "Trauma" OR AB "Traumatic" OR AB "Fear*" OR AB "Anxi*" OR AB "Stress" OR AB "Distress" OR AB "Adaptation" OR AB "Coping" OR AB "Stigma"</p> |
| 4 | #1 AND #2 AND #3                                                                                                                                                                                                                                                                                                                                                                                                                                                                                                                                                                                                                                                                                                                                                                                                                                                                                                                                                                                                                                                                                                                                                                                                                                                                                                                                                                                                                                                                                                                                                                                                                                                                                                                                                                                                                                                                                                                                                               |

## CINAHL (January 1, 2003 through March 26, 2020)

| # | Search terms                                                                                                                                                                                                                                                                                                                                                                                                                                                                                                                                                                                                                                                                                                                                                                                                                                                                                                                                                                                                                                                                                                                                                                                                                                                                                                                                                                                                                                                                                                                                                                                                                                                                                                                                                                                                                                                          |
|---|-----------------------------------------------------------------------------------------------------------------------------------------------------------------------------------------------------------------------------------------------------------------------------------------------------------------------------------------------------------------------------------------------------------------------------------------------------------------------------------------------------------------------------------------------------------------------------------------------------------------------------------------------------------------------------------------------------------------------------------------------------------------------------------------------------------------------------------------------------------------------------------------------------------------------------------------------------------------------------------------------------------------------------------------------------------------------------------------------------------------------------------------------------------------------------------------------------------------------------------------------------------------------------------------------------------------------------------------------------------------------------------------------------------------------------------------------------------------------------------------------------------------------------------------------------------------------------------------------------------------------------------------------------------------------------------------------------------------------------------------------------------------------------------------------------------------------------------------------------------------------|
| 1 | MH "Medical Staff+" OR MH "Medical Staff, Hospital+" OR MH "Nursing Staff, Hospital" OR MH "Nurses+" OR MH "Physicians+" OR MH "Health Personnel" OR TI "medical staff" OR TI "Physician" OR TI "Doctors" OR TI "Doctor" OR TI "Clinicians" OR TI "Clinician" OR TI "Nursing Staff" OR TI "Nurses" OR TI "Nurse" OR TI "Health care Professionals" OR TI "Health care Worker" OR TI "Health Care Professionals" OR TI "Health Care Worker" OR TI "Health Professionals" OR TI "Health Worker" OR TI "Health care Professionals" OR TI "Health care Professional" OR TI "Health Care Professionals" OR TI "Health Care Professional" OR TI "Health Professionals" OR TI "Health Professional" OR TI "Health care Providers" OR TI "Health care Provider" OR TI "Health Care Providers" OR TI "Health Care Provider" OR TI "Health Providers" OR TI "Health Provider" OR TI "Hospital professionals" OR TI "Hospital worker" OR TI "Hospital Employees" OR TI "Hospital Employee" OR TI "Medical House Staff" OR AB "medical staff" OR AB "Physician" OR AB "Doctors" OR AB "Doctor" OR AB "Clinicians" OR AB "Clinician" OR AB "Nursing Staff" OR AB "Nurses" OR AB "Nurse" OR AB "Health care Professionals" OR AB "Health care Worker" OR AB "Health Care Professionals" OR AB "Health Care Worker" OR AB "Health Professionals" OR AB "Health Worker" OR AB "Health care Professionals" OR AB "Health care Professional" OR AB "Health Care Professionals" OR AB "Health Care Professional" OR AB "Health Professionals" OR AB "Health Professional" OR AB "Health care Providers" OR AB "Health care Provider" OR AB "Health Care Providers" OR AB "Health Care Provider" OR AB "Health Providers" OR AB "Health Provider" OR AB "Hospital professionals" OR AB "Hospital worker" OR AB "Hospital Employees" OR AB "Hospital Employee" OR AB "Medical House Staff" |
| 2 | MH "Disease Outbreaks" OR MH "Severe Acute Respiratory Syndrome" OR MH "SARS Virus" OR MH "Middle East Respiratory Syndrome" OR MH "Middle East Respiratory Syndrome Coronavirus" OR MH "Ebola Virus" OR TI "Disease Outbreaks" OR TI "Pandemic" OR TI "Epidemic" OR TI "Emerging Communicable Disease*" OR TI "Emerging Infectious Disease*" OR TI "Severe Acute Respiratory Syndrome" OR TI "SARS" OR TI "Middle East Respiratory Syndrome" OR TI "MERS" OR TI "Ebola*" OR TI "Corona" OR TI "Coronavirus" OR TI "COVID-19" OR TI "2019-nCoV" OR TI "SARS-CoV" OR TI "MERS-CoV" OR TI "Sars-Cov-2" OR AB "Disease Outbreak*" OR AB "Pandemic" OR AB "Epidemic" OR AB "Emerging Communicable Disease*" OR AB "Emerging Infectious Disease*" OR AB "Severe Acute Respiratory Syndrome" OR AB "SARS" OR AB "Middle East Respiratory Syndrome" OR AB "MERS" OR AB "Ebola*" OR AB "Corona" OR AB "Coronavirus" OR AB "COVID-19" OR AB "2019-nCoV" OR AB "SARS-CoV" OR AB "MERS-CoV" OR AB "Sars-Cov-2"                                                                                                                                                                                                                                                                                                                                                                                                                                                                                                                                                                                                                                                                                                                                                                                                                                                                   |
| 3 | MH "Fatigue+" OR MH "Burnout, Professional+" OR MH "Mental Health" OR MH "Occupational Health+" OR MH "Mental Status" OR MH "Occupational-Related Injuries" OR MH "Psychological Well-Being" OR MH "Stress, Occupational+" OR MH "Professionalism" OR MH "Trauma+" OR MH "Stress Disorders, Post-Traumatic+" OR MH "Anxiety+" OR MH "Stress" OR MH "Adaptation, Occupational" OR MH "Adaptation, Physiological+" OR MH "Coping+" OR MH "Stigma" OR TI "Resilience" OR TI "Persever*" OR TI "Physical Health" OR TI "Physical Impact" OR TI "Physical                                                                                                                                                                                                                                                                                                                                                                                                                                                                                                                                                                                                                                                                                                                                                                                                                                                                                                                                                                                                                                                                                                                                                                                                                                                                                                                  |

|   |                                                                                                                                                                                                                                                                                                                                                                                                                                                                                                                                                                                                                                                                                                                                                                                                                                                                                                                                                                                                                                                                                                                                                                                                                                                                                                                                                                                                                                                                                                                                                                                                                                                                                                                                                                                                                             |
|---|-----------------------------------------------------------------------------------------------------------------------------------------------------------------------------------------------------------------------------------------------------------------------------------------------------------------------------------------------------------------------------------------------------------------------------------------------------------------------------------------------------------------------------------------------------------------------------------------------------------------------------------------------------------------------------------------------------------------------------------------------------------------------------------------------------------------------------------------------------------------------------------------------------------------------------------------------------------------------------------------------------------------------------------------------------------------------------------------------------------------------------------------------------------------------------------------------------------------------------------------------------------------------------------------------------------------------------------------------------------------------------------------------------------------------------------------------------------------------------------------------------------------------------------------------------------------------------------------------------------------------------------------------------------------------------------------------------------------------------------------------------------------------------------------------------------------------------|
|   | <p>Effect*" OR TI "Physical Outcome*" OR TI "Physical Workload" OR TI "Fatigue" OR TI "Mental Health" OR TI "Psychological Health" OR TI "Emotional Health" OR TI "Mental Impact" OR TI "Psychological Impact" OR TI "Emotional Impact" OR TI "Mental Effect*" OR TI "Psychological Effect*" OR TI "Emotional Effect*" OR TI "Mental Outcome*" OR TI "Psychological Outcome*" OR TI "Emotional Outcome*" OR TI "Mental Workload" OR TI "Psychological Workload" OR TI "Emotional Workload" OR TI "Wellbeing" OR TI "Burnout" OR TI "Burn-out" OR TI "Occupational Health" OR TI "Occupational Injury" OR TI "Occupational Disability" OR TI "Occupational Effect*" OR TI "Professionalism" OR TI "Trauma" OR TI "Traumatic" OR TI "Fear*" OR TI "Anxiety" OR TI "Anxious" OR TI "Stress" OR TI "Distress" OR TI "Adaptation" OR TI "Coping" OR TI "Stigma" OR AB "Resilience" OR AB "Persever*" OR AB "Physical Health" OR AB "Physical Impact" OR AB "Physical Effect*" OR AB "Physical Outcome*" OR AB "Physical Workload" OR AB "Fatigue" OR AB "Mental Health" OR AB "Psychological Health" OR AB "Emotional Health" OR AB "Mental Impact" OR AB "Psychological Impact" OR AB "Emotional Impact" OR AB "Mental Effect*" OR AB "Psychological Effect*" OR AB "Emotional Effect*" OR AB "Mental Outcome*" OR AB "Psychological Outcome*" OR AB "Emotional Outcome*" OR AB "Mental Workload" OR AB "Psychological Workload" OR AB "Emotional Workload" OR AB "Wellbeing" OR AB "Burnout" OR AB "Burn-out" OR AB "Occupational Health" OR AB "Occupational Injury" OR AB "Occupational Disability" OR AB "Occupational Effect*" OR AB "Professionalism" OR AB "Trauma" OR AB "Traumatic" OR AB "Fear*" OR AB "Anxiety" OR AB "Anxious" OR AB "Stress" OR AB "Distress" OR AB "Adaptation" OR AB "Coping" OR AB "Stigma"</p> |
| 4 | #1 AND #2 AND #3                                                                                                                                                                                                                                                                                                                                                                                                                                                                                                                                                                                                                                                                                                                                                                                                                                                                                                                                                                                                                                                                                                                                                                                                                                                                                                                                                                                                                                                                                                                                                                                                                                                                                                                                                                                                            |

**bioRxiv & medRxiv (January 3, 2020 through March 26, 2020)**

The possibilities of using search terms in bioRxiv and medRxiv are limited. For now, focus was on COVID-19-related terms in line with a COVID-19 Living Systematic Review (<https://ispmbern.github.io/covid-19/living-review/collectingdata.html>):

**ncov OR corona OR wuhan OR COVID OR SARS-CoV-2**

A direct link to the search strategy and results (Note: as a result of publication in peer-reviewed journals, studies will disappear from the archive, so the numbers found today may differ from the numbers presented in the current study):

[https://www.biorxiv.org/search/ncov%252Bor%252Bcorona%252Bor%252Bwuhan%252Bor%252BCOVID%252Bor%252BSARS-CoV-2%20jcode%3Amedrxiv%7C%7Cbiorxiv%20limit\\_from%3A2020-01-03%20limit\\_to%3A2020-03-26%20numresults%3A75%20sort%3Apublication-date%20direction%3Adescending%20format\\_result%3Astandard](https://www.biorxiv.org/search/ncov%252Bor%252Bcorona%252Bor%252Bwuhan%252Bor%252BCOVID%252Bor%252BSARS-CoV-2%20jcode%3Amedrxiv%7C%7Cbiorxiv%20limit_from%3A2020-01-03%20limit_to%3A2020-03-26%20numresults%3A75%20sort%3Apublication-date%20direction%3Adescending%20format_result%3Astandard)



**Table 1: Interventions/ recommendations prior to/ in run-up to the crisis: resilience**

|                    | INTERVENTIONS / RECOMMENDATIONS PRIOR TO / IN RUN-UP TO THE CRISIS                                                                                                                                                         |                                                                                                                                                 |                                                                                                                                                                                                                                                  |
|--------------------|----------------------------------------------------------------------------------------------------------------------------------------------------------------------------------------------------------------------------|-------------------------------------------------------------------------------------------------------------------------------------------------|--------------------------------------------------------------------------------------------------------------------------------------------------------------------------------------------------------------------------------------------------|
| First author, year | RESILIENCE                                                                                                                                                                                                                 |                                                                                                                                                 |                                                                                                                                                                                                                                                  |
|                    | Education and training                                                                                                                                                                                                     | Resilience training                                                                                                                             | Perceptions of preparedness                                                                                                                                                                                                                      |
| Abolfotouh, 2017   |                                                                                                                                                                                                                            | Counselling and incentives to boost morale and maintain levels of service.                                                                      | Compliance with the recommendations of the WHO; provisions to protect them through infection-control measures, personal-protection practices and anti-viral medications.                                                                         |
| Al Ghobain, 2017   | Infection control training.                                                                                                                                                                                                |                                                                                                                                                 | Perception that there is adequate staff in the workplace to handle the increased demand. A clear plan to handle a MERS outbreak (e.g. cancellation of outpatient clinics, visitor restrictions, mandatory wearing of protective measures, etc.). |
| Andertun, 2017     |                                                                                                                                                                                                                            | Training (preparedness / development of strategies) is crucial for safety, managing risks. Feelings of meaningfulness essential to be prepared. | Reliance in a safe, organized effort. Trust in personal protection equipment (PPE) quality.                                                                                                                                                      |
| Belfroid, 2018     | Training / simulation provided a feeling of being prepared                                                                                                                                                                 |                                                                                                                                                 | Increase feeling of safety when protocols with clear tasks are available and when these are continuously reviewed and improved                                                                                                                   |
| Bell, 2017         | Lack of training increases feelings of fear                                                                                                                                                                                |                                                                                                                                                 | Resource constraints increased feelings of fear and stress                                                                                                                                                                                       |
| Brooks, 2018       | Provide appropriate specialized training to equip workers with skills, knowledge and confidence - i.e. infection control training.                                                                                         | Provide appropriate specialized training to equip workers with skills, knowledge and confidence                                                 |                                                                                                                                                                                                                                                  |
| Carvalho, 2019     | Multi-professional simulation-based training (5 days, principles of Ebola care, biosafety, high fidelity simulations of procedures, )could reduce anxiety and fear (training: high satisfaction and perceptions of safety) |                                                                                                                                                 |                                                                                                                                                                                                                                                  |
| Chen, 2005         | Give nurses extensive training (infection control and self-protection)                                                                                                                                                     |                                                                                                                                                 |                                                                                                                                                                                                                                                  |
| Lehmann, 2016      | preparation and training (lead to high level of health related quality of life): Biweekly mandatory training including decontamination procedures, technical aspects and emergency training.                               |                                                                                                                                                 |                                                                                                                                                                                                                                                  |
| Li, 2018           |                                                                                                                                                                                                                            | *strengthen psychological exercise                                                                                                              |                                                                                                                                                                                                                                                  |
| Liu, 2019          | safety training                                                                                                                                                                                                            |                                                                                                                                                 | Targeted measures, proper responses, and good community support can effectively lower stress to ensure the nurses' physical and mental health, (and enable them to play better roles during international aid missions)                          |

|                    | INTERVENTIONS / RECOMMENDATIONS PRIOR TO / IN RUN-UP TO THE CRISIS                                                                                                                                                                                                                                                                                                                                                                                             |                                                                                                                                                                                                                                                                                                                                      |                                                                                                                                                                                                                                                                                                                                                                                                                                                                                                                                                                                                                                                                                                                                                                                        |
|--------------------|----------------------------------------------------------------------------------------------------------------------------------------------------------------------------------------------------------------------------------------------------------------------------------------------------------------------------------------------------------------------------------------------------------------------------------------------------------------|--------------------------------------------------------------------------------------------------------------------------------------------------------------------------------------------------------------------------------------------------------------------------------------------------------------------------------------|----------------------------------------------------------------------------------------------------------------------------------------------------------------------------------------------------------------------------------------------------------------------------------------------------------------------------------------------------------------------------------------------------------------------------------------------------------------------------------------------------------------------------------------------------------------------------------------------------------------------------------------------------------------------------------------------------------------------------------------------------------------------------------------|
| First author, year | RESILIENCE                                                                                                                                                                                                                                                                                                                                                                                                                                                     |                                                                                                                                                                                                                                                                                                                                      |                                                                                                                                                                                                                                                                                                                                                                                                                                                                                                                                                                                                                                                                                                                                                                                        |
|                    | Education and training                                                                                                                                                                                                                                                                                                                                                                                                                                         | Resilience training                                                                                                                                                                                                                                                                                                                  | Perceptions of preparedness                                                                                                                                                                                                                                                                                                                                                                                                                                                                                                                                                                                                                                                                                                                                                            |
| Lu, 2006           | Training in preventing infection; learn how to cope with stress                                                                                                                                                                                                                                                                                                                                                                                                |                                                                                                                                                                                                                                                                                                                                      |                                                                                                                                                                                                                                                                                                                                                                                                                                                                                                                                                                                                                                                                                                                                                                                        |
| Marjanovic, 2007   | Teaching nurses new working strategies that could help them                                                                                                                                                                                                                                                                                                                                                                                                    |                                                                                                                                                                                                                                                                                                                                      |                                                                                                                                                                                                                                                                                                                                                                                                                                                                                                                                                                                                                                                                                                                                                                                        |
| Marrs, 2019        | Simulation-based exercises and Team STEPPS (e.g. inter-professional teamwork) could directly address this deficiency and enhance existing high consequence infectious diseases training plans by increasing health care worker self-efficacy and decreasing anxiety<br>A simulated environment used in this program allowed subjects to practice clinical skills while donned in first responder PPE without harming actual patients, team members, or oneself |                                                                                                                                                                                                                                                                                                                                      |                                                                                                                                                                                                                                                                                                                                                                                                                                                                                                                                                                                                                                                                                                                                                                                        |
| Maunder, 2004a     | Established trust in a source of information prior to a crisis increases that source's credibility during crisis.                                                                                                                                                                                                                                                                                                                                              |                                                                                                                                                                                                                                                                                                                                      |                                                                                                                                                                                                                                                                                                                                                                                                                                                                                                                                                                                                                                                                                                                                                                                        |
| Maunder, 2006      |                                                                                                                                                                                                                                                                                                                                                                                                                                                                | Effective staff support may be a primary target to bolster the resilience of healthcare workers who will face future outbreaks. Effective moral or psychological support typically occurs in the context of trusted professional and institutional relationships, which should ideally be established before the outbreak situation. | <ul style="list-style-type: none"> <li>- Effective support benefits from careful planning and preparation before an outbreak.</li> <li>- Engaging staff in collaborative planning for future outbreaks may reduce the tendency to cope by means of avoidant strategies and may enhance coping through problem-solving and peer-support.</li> <li>- Reducing patient-to-nurse ratios (pre-pandemic).</li> <li>- Increasing organizational characteristics that increase nurses' autonomy, flexibility, control over practice, and perceived empowerment.</li> <li>- Anger and blame directed toward others (hostile confrontation) or oneself (self-blame) may be reduced in a working environment that fosters positive working relationships through effective leadership.</li> </ul> |
| Maunder, 2003      |                                                                                                                                                                                                                                                                                                                                                                                                                                                                |                                                                                                                                                                                                                                                                                                                                      | Strong pre-existing relationships among psychiatrists, administrators, nurses and social workers > helpful in crafting flexible and responsive solutions to changing demands and stresses on staff, patients and families.                                                                                                                                                                                                                                                                                                                                                                                                                                                                                                                                                             |
| O'Boyle, 2006      | adequate training, drills, order and structure amidst chaos                                                                                                                                                                                                                                                                                                                                                                                                    |                                                                                                                                                                                                                                                                                                                                      | Develop emergency prepared plans. Preparations for emergencies should include assessments of nurses' and other stakeholders' concern. hospital leadership                                                                                                                                                                                                                                                                                                                                                                                                                                                                                                                                                                                                                              |
| Smith, 2017        |                                                                                                                                                                                                                                                                                                                                                                                                                                                                |                                                                                                                                                                                                                                                                                                                                      | personal protective equipment (PPE) protocols                                                                                                                                                                                                                                                                                                                                                                                                                                                                                                                                                                                                                                                                                                                                          |

|                    | INTERVENTIONS / RECOMMENDATIONS PRIOR TO / IN RUN-UP TO THE CRISIS                                                                                                                                                                                                                                                                                                                                        |                     |                                                                                                                              |
|--------------------|-----------------------------------------------------------------------------------------------------------------------------------------------------------------------------------------------------------------------------------------------------------------------------------------------------------------------------------------------------------------------------------------------------------|---------------------|------------------------------------------------------------------------------------------------------------------------------|
| First author, year | RESILIENCE                                                                                                                                                                                                                                                                                                                                                                                                |                     |                                                                                                                              |
|                    | Education and training                                                                                                                                                                                                                                                                                                                                                                                    | Resilience training | Perceptions of preparedness                                                                                                  |
| Speroni, 2015a     | training of nurses and ancillary service staff to safely provide care for confirmed and/or PUI EVD patients                                                                                                                                                                                                                                                                                               |                     |                                                                                                                              |
| Speroni, 2015b     | Education, training, needed to ensure safe donning/doffing                                                                                                                                                                                                                                                                                                                                                |                     | the structures and processes (i.e. in protocols) should be grounded by effective, evidence-informed communication strategies |
| Tam, 2004          |                                                                                                                                                                                                                                                                                                                                                                                                           |                     | Healthcare workers needed to be "altruistic and brave" (public pressure)                                                     |
| Wong, 2005         | Health authorities should plan ahead of time to provide proactive psychological support for staff *psycho-educational programmes in emergency preparedness training. programme should help staff deal with issues of isolation and stigmatization, adopt proactive approaches to manage work fatigue and workload stress, help staff to deal with anxiety and depression, and develop good coping skills. |                     |                                                                                                                              |
| Bhagavathula, 2020 |                                                                                                                                                                                                                                                                                                                                                                                                           |                     | Relying on authentic sources is a key factor in believing transparent information about                                      |

**Table 2: Interventions/ recommendations during the crisis: resilience**

|                    | INTERVENTIONS/ RECOMMENDATIONS DURING THE CRISIS                                                                                                                                                                                                               |                                                                          |                                                                                                                                                             |                                                                                                  |                                                                                                                |
|--------------------|----------------------------------------------------------------------------------------------------------------------------------------------------------------------------------------------------------------------------------------------------------------|--------------------------------------------------------------------------|-------------------------------------------------------------------------------------------------------------------------------------------------------------|--------------------------------------------------------------------------------------------------|----------------------------------------------------------------------------------------------------------------|
| First author, year | RESILIENCE                                                                                                                                                                                                                                                     |                                                                          |                                                                                                                                                             |                                                                                                  |                                                                                                                |
|                    | Information (receiving for professionals)                                                                                                                                                                                                                      | Information (providing by professionals)                                 | Psychosocial support and treatment                                                                                                                          | Monitoring health status of professionals                                                        | Form and content of (psychosocial) support                                                                     |
| Bai, 2004          | Timely SARS information to reduce uncertainty and minimize stigmatization                                                                                                                                                                                      |                                                                          | Despite informal support and education, there is a need for professional psychosocial support                                                               |                                                                                                  |                                                                                                                |
| Belfroid, 2018     |                                                                                                                                                                                                                                                                |                                                                          |                                                                                                                                                             |                                                                                                  | Use team- members as an outlet for emotions / feelings to reduce stress levels                                 |
| Bournes, 2005      | Focused communication mechanisms using a variety of media increases persevering through difficult times                                                                                                                                                        |                                                                          | Solid personal and professional support increases persevering through difficult times                                                                       |                                                                                                  | Continuously cultivate collegueship and teamwork to increase persevering through difficult times               |
| Brooks, 2018       | Provide web-based support and information to equip workers with skills, knowledge and confidence - i.e. infection control training. This also reduces feelings of social isolation Also emphasize the positive things of working in a crisis: personal growth. |                                                                          | Develop occupational health policies and support systems to promote psychological wellbeing. Evaluate and address psychological distress during the crisis. |                                                                                                  | Try to do everything to enhance camaraderie and team cohesion - this also reduces feelings of social isolation |
| Bukhari, 2016      |                                                                                                                                                                                                                                                                |                                                                          | Provide professional psychosocial support interventions to reduce worries and fear                                                                          |                                                                                                  |                                                                                                                |
| Chan, 2004         |                                                                                                                                                                                                                                                                |                                                                          | Stress management programmes, critical incident stress management and peer support programmes.                                                              |                                                                                                  | Support services are essential; these should be flexible, collegial and varied in form.                        |
| Chan, 2005         | Education for nurses about infection, control and crisis management.                                                                                                                                                                                           | Provide a communication system between management and frontline workers. | Counselling services (manage stress and anxiety)                                                                                                            |                                                                                                  |                                                                                                                |
| Chen, 2005         |                                                                                                                                                                                                                                                                |                                                                          |                                                                                                                                                             | Screening at-risk nurses for distress so that psychological intervention can be provided         |                                                                                                                |
| Chen, 2007         |                                                                                                                                                                                                                                                                |                                                                          |                                                                                                                                                             | Psychological counselling for long-term follow-up (more than 1 month) of employee mental status. | Support social functioning (friends) after shifts.                                                             |
| Chen, 2006         | In-service training including nursing care; information daily update                                                                                                                                                                                           |                                                                          |                                                                                                                                                             |                                                                                                  |                                                                                                                |

|                                   | INTERVENTIONS/ RECOMMENDATIONS DURING THE CRISIS                                                             |                                                                                                                                              |                                                                                                                                                                                                                                                      |                                           |                                                                                                                                             |
|-----------------------------------|--------------------------------------------------------------------------------------------------------------|----------------------------------------------------------------------------------------------------------------------------------------------|------------------------------------------------------------------------------------------------------------------------------------------------------------------------------------------------------------------------------------------------------|-------------------------------------------|---------------------------------------------------------------------------------------------------------------------------------------------|
| First author, year                | RESILIENCE                                                                                                   |                                                                                                                                              |                                                                                                                                                                                                                                                      |                                           |                                                                                                                                             |
|                                   | Information (receiving by professionals)                                                                     | Information (providing by professionals)                                                                                                     | Psychosocial support and treatment                                                                                                                                                                                                                   | Monitoring health status of professionals | Form and content of (psychosocial) support                                                                                                  |
| Chua, 2004                        | 100% attendance infection-control training necessary                                                         |                                                                                                                                              |                                                                                                                                                                                                                                                      |                                           |                                                                                                                                             |
| Fiksenbaum, 2006<br>Gearing, 2007 | Organizations should create and maintain strong support networks to reduce the influence of stressors        |                                                                                                                                              |                                                                                                                                                                                                                                                      |                                           |                                                                                                                                             |
| Hewlett, 2005                     | biomedical training and knowledge about the disease                                                          | providing knowledge (biomedical and traditional) to common people because with knowledge, stigmatization decreased and cooperation increased |                                                                                                                                                                                                                                                      |                                           |                                                                                                                                             |
| Grace, 2005                       | Timely information sharing; staying informed about SARS                                                      |                                                                                                                                              | psycho-social support to help physicians cope with their fear of infectivity and the risks to their families                                                                                                                                         |                                           |                                                                                                                                             |
| Imai, 2005                        | adequately training healthcare workers in the use of personal protective equipment is an important           |                                                                                                                                              |                                                                                                                                                                                                                                                      |                                           |                                                                                                                                             |
| Jeong-Sil, 2018                   | On outbreak of disease: establish a protocol/guidelines and equipment (by gov./hosp.)<br>Educate nurses      |                                                                                                                                              |                                                                                                                                                                                                                                                      |                                           |                                                                                                                                             |
| Kang, 2018                        | burden: frequent changing guidelines and protocols<br>beneficial: share experience and good examples of care | provide information quick and easily, using e.g. app-systems                                                                                 | concerns for safety and discomfort of wearing protection materials are causes of burden                                                                                                                                                              |                                           | urgent need for (peer) support, share experiences of good and bad care situations                                                           |
| Khalid, 2016                      |                                                                                                              |                                                                                                                                              | Fear of being infected among healthcare workers reduced by positive attitudes in the workplace, clinical improvement of infected colleagues, and stoppage of disease transmission among healthcare workers after adopting strict protective measures |                                           | stress among healthcare workers is alleviated by strict infection control practice guidance and provision of personal protective equipment. |

|                    | INTERVENTIONS/ RECOMMENDATIONS DURING THE CRISIS                                                                                                                                             |                                                                                        |                                                                                                                                                                                           |                                                                                                           |                                                                                                                                  |
|--------------------|----------------------------------------------------------------------------------------------------------------------------------------------------------------------------------------------|----------------------------------------------------------------------------------------|-------------------------------------------------------------------------------------------------------------------------------------------------------------------------------------------|-----------------------------------------------------------------------------------------------------------|----------------------------------------------------------------------------------------------------------------------------------|
| First author, year | RESILIENCE                                                                                                                                                                                   |                                                                                        |                                                                                                                                                                                           |                                                                                                           |                                                                                                                                  |
|                    | Information (receiving for professionals)                                                                                                                                                    | Information (providing by professionals)                                               | Psychosocial support and treatment                                                                                                                                                        | Monitoring health status of professionals                                                                 | Form and content of (psychosocial) support                                                                                       |
| Kim, 2016          |                                                                                                                                                                                              |                                                                                        | Job-related Stress was the most important determinant of burnout                                                                                                                          |                                                                                                           | personal protective equipment in alleviating their stress                                                                        |
| Kim, 2018          | Constant executive and societal rewards are important to persevere during the crisis.                                                                                                        |                                                                                        |                                                                                                                                                                                           |                                                                                                           | Comradery and good teamwork was of great support                                                                                 |
| Lai, 2020          |                                                                                                                                                                                              |                                                                                        | Interventions to promote mental well-being in health care workers need to be immediately implemented, with women, nurses, and frontline workers requiring particular attention.           |                                                                                                           |                                                                                                                                  |
| Lee, 2005          | Offer a regular education program (without frequent changes in infection control measures and the documentation process).                                                                    | Provide briefing sessions after a work day (in safe, quiet, independent meeting place) |                                                                                                                                                                                           |                                                                                                           | Psychiatric service helped to manage stress.                                                                                     |
| Lehmann, 2016      | *knowledge should be given to staff who are & who are not directly involved in treatment of infected patients *provide proper communication with public to reduce fear and anxiety (by gov). |                                                                                        |                                                                                                                                                                                           |                                                                                                           |                                                                                                                                  |
| Li, 2018           |                                                                                                                                                                                              |                                                                                        | To give professional psychological counselling and health care for team member if necessary; provide mental health support to relieve anxiety                                             |                                                                                                           |                                                                                                                                  |
| Li, 2020           | transparent announcement of epidemic information can facilitate psychological treatment                                                                                                      |                                                                                        |                                                                                                                                                                                           | the society and psychotherapists should actively pay more attention to the psychological problems of FLNs |                                                                                                                                  |
| Lin, 2007          | Offering prompt and authoritative information at the beginning of the outbreak                                                                                                               |                                                                                        | Flexible and non-intrusive psychiatric intervention; psychological support, sufficient resources and definite procedures should be available immediately; providing support and education |                                                                                                           | Comfortable environment to share their reactions to tremendous stress                                                            |
| Liu, 2019          | reliable and timely scientific evidence can help the medical staff to lower their feelings of unsafety, face the risks, and relieve unnecessary stress.;                                     | Full cooperation between the medical team and local                                    | This medical team had a psychological counsellor and the nurses were encouraged to confide and seek timely, positive help                                                                 |                                                                                                           | Before the team was dispatched, the hospital arranged counselling, sleep guidance, social etiquette training, and verbal English |

|                    | INTERVENTIONS/ RECOMMENDATIONS DURING THE CRISIS                                                                                                                                                             |                                                                 |                                                                                                                                                                                                                |                                                                                                                                                          |                                                                                                                                                                                                                                                                                                                                                                                                                                                                                                                                  |
|--------------------|--------------------------------------------------------------------------------------------------------------------------------------------------------------------------------------------------------------|-----------------------------------------------------------------|----------------------------------------------------------------------------------------------------------------------------------------------------------------------------------------------------------------|----------------------------------------------------------------------------------------------------------------------------------------------------------|----------------------------------------------------------------------------------------------------------------------------------------------------------------------------------------------------------------------------------------------------------------------------------------------------------------------------------------------------------------------------------------------------------------------------------------------------------------------------------------------------------------------------------|
| First author, year | RESILIENCE                                                                                                                                                                                                   |                                                                 |                                                                                                                                                                                                                |                                                                                                                                                          |                                                                                                                                                                                                                                                                                                                                                                                                                                                                                                                                  |
|                    | Information (receiving for professionals)                                                                                                                                                                    | Information (providing by professionals)                        | Psychosocial support and treatment                                                                                                                                                                             | Monitoring health status of professionals                                                                                                                | Form and content of (psychosocial) support                                                                                                                                                                                                                                                                                                                                                                                                                                                                                       |
|                    | The medical team members can obtain updates about the disease and ensure smooth information flow so that all involved can properly understand the risks.                                                     | hospital in both the front- and rear lines; close communication |                                                                                                                                                                                                                |                                                                                                                                                          | training for the nurses to reduce possible sources of stress; The hospital also provided sleep aids and improved food to help the nurses relieve stress symptoms; the support from family and the hospital helped them feel relaxed.                                                                                                                                                                                                                                                                                             |
| Liu, 2012          |                                                                                                                                                                                                              |                                                                 | Altruistic acceptance of risk was found to decrease the odds of having a high current level of depressive symptoms. Spend time in quarantine, may be at elevated risk for depression, even over the long term. |                                                                                                                                                          |                                                                                                                                                                                                                                                                                                                                                                                                                                                                                                                                  |
| Marjanovic, 2007   |                                                                                                                                                                                                              |                                                                 |                                                                                                                                                                                                                |                                                                                                                                                          | Making organizational supports congruent with nurses' specific needs, and by helping nurses reduce feelings of uncertainty and fear when these crises occur                                                                                                                                                                                                                                                                                                                                                                      |
| Maunder, 2004a     | Adequate training. Clearly communicating risk information; acknowledge substantially different levels of awareness of knowledge among expert investigators, clinicians, public officials and the lay public. |                                                                 |                                                                                                                                                                                                                | The costs of interpersonal isolation need to be borne in mind when widespread infection control procedures are implemented (isolation increases stress). | - Positive influence on the well-being of healthcare workers through contact with the popular media (e.g. description of nurses as heroes).<br>- Measures to increase communication and interpersonal support to mitigate the inevitable stress of the situation; enhanced use of email and hospital intranet and Internet facilities, telephone messaging, 'buddying' of healthcare workers in higher risk areas, formal and informal telephone and fax networks (especially for quarantined workers), and telephone helplines. |

|                    | INTERVENTIONS/ RECOMMENDATIONS DURING THE CRISIS                                                                                                                                                                                                                                                                                                                                                                                                                                                                                                                                                                                       |                                          |                                                                                                                                                                                                                                                                                                                                                                                                                                                                                                              |                                                                                                                                                                                                                                                                                    |                                                                                                                                                                                                                                                                                                                                                                                                                                                                                            |
|--------------------|----------------------------------------------------------------------------------------------------------------------------------------------------------------------------------------------------------------------------------------------------------------------------------------------------------------------------------------------------------------------------------------------------------------------------------------------------------------------------------------------------------------------------------------------------------------------------------------------------------------------------------------|------------------------------------------|--------------------------------------------------------------------------------------------------------------------------------------------------------------------------------------------------------------------------------------------------------------------------------------------------------------------------------------------------------------------------------------------------------------------------------------------------------------------------------------------------------------|------------------------------------------------------------------------------------------------------------------------------------------------------------------------------------------------------------------------------------------------------------------------------------|--------------------------------------------------------------------------------------------------------------------------------------------------------------------------------------------------------------------------------------------------------------------------------------------------------------------------------------------------------------------------------------------------------------------------------------------------------------------------------------------|
| First author, year | RESILIENCE                                                                                                                                                                                                                                                                                                                                                                                                                                                                                                                                                                                                                             |                                          |                                                                                                                                                                                                                                                                                                                                                                                                                                                                                                              |                                                                                                                                                                                                                                                                                    |                                                                                                                                                                                                                                                                                                                                                                                                                                                                                            |
|                    | Information (receiving for professionals)                                                                                                                                                                                                                                                                                                                                                                                                                                                                                                                                                                                              | Information (providing by professionals) | Psychosocial support and treatment                                                                                                                                                                                                                                                                                                                                                                                                                                                                           | Monitoring health status of professionals                                                                                                                                                                                                                                          | Form and content of (psychosocial) support                                                                                                                                                                                                                                                                                                                                                                                                                                                 |
| Maunder, 2006      | Responsive communication.                                                                                                                                                                                                                                                                                                                                                                                                                                                                                                                                                                                                              |                                          | <ul style="list-style-type: none"> <li>- Enhanced support and training may reduce burnout and posttraumatic stress.</li> <li>- Interventions that reduce maladaptive coping may decrease prolonged suffering.</li> </ul>                                                                                                                                                                                                                                                                                     |                                                                                                                                                                                                                                                                                    | <ul style="list-style-type: none"> <li>- Opportunities for facilitated reflection on normal emotional responses to extraordinary stress.</li> <li>- Opportunities for mentorship or "buddying" with more experienced colleagues may be useful.</li> </ul>                                                                                                                                                                                                                                  |
| Maunder, 2003      | <ul style="list-style-type: none"> <li>- Immediate clear information in repeated, succinct messages.</li> <li>- A pamphlet identifying signs of anxiety and stress and information about support resources, which was distributed to every nursing unit and program area.</li> <li>- Modification of infection control procedures and public health recommendations day by day, and sometimes hour by hour, increased uncertainty (= negative).</li> <li>- The perception of personal danger was heightened by the known lethality of the syndrome and intense media coverage of the outbreak and its effects (= negative).</li> </ul> |                                          | <ul style="list-style-type: none"> <li>- Psychiatric staff who were on the units to see patients lingered to chat with staff.</li> <li>- Informal individual contacts between psychiatric staff and colleagues in medicine, surgery and administration in which simple gestures of support and advice (+ also another psychiatrist with whom they had no working relationship).</li> <li>- A confidential telephone support line staffed by inpatient psychiatric nurses for all hospital staff .</li> </ul> | <ul style="list-style-type: none"> <li>- Conflict between their roles as health care provider and parent (= negative).</li> <li>- Quarantine &gt; concerns about personal safety, transmitting to family members, stigmatization, interpersonal isolation (= negative).</li> </ul> | <ul style="list-style-type: none"> <li>- Leadership by example, when leaders advocate and use peer support.</li> <li>- Aggressive attempts to educate staff and patients about the impairment that results from sleep deprivation and to treat insomnia.</li> <li>- Staff members were discouraged from interacting outside the hospital with colleagues and staff meetings were discouraged, at a time at which people wished to seek each other out for support (= negative).</li> </ul> |
| O'Boyle, 2006      | accessible information and content experts should be available                                                                                                                                                                                                                                                                                                                                                                                                                                                                                                                                                                         |                                          | Emotional and physical support to improve coping abilities during emergency                                                                                                                                                                                                                                                                                                                                                                                                                                  | specific measures to improve safely, reduce anxiety, and increase trust in hospitals                                                                                                                                                                                               | communication with nurses' families                                                                                                                                                                                                                                                                                                                                                                                                                                                        |
| Poon, 2004         |                                                                                                                                                                                                                                                                                                                                                                                                                                                                                                                                                                                                                                        |                                          | Mean anxiety levels were higher among workmen, health care assistants, and nurses than among administrative staff controls or doctors. Anxiety scores were correlated with burnout scores, with contact with patients who had SARS, and with discomfort from wearing protective gear.                                                                                                                                                                                                                        |                                                                                                                                                                                                                                                                                    |                                                                                                                                                                                                                                                                                                                                                                                                                                                                                            |
| Rambaldini, 2005   | effective communication needs to focus among others                                                                                                                                                                                                                                                                                                                                                                                                                                                                                                                                                                                    |                                          | the restriction in social interaction easily result in isolation, need for optimal communication                                                                                                                                                                                                                                                                                                                                                                                                             |                                                                                                                                                                                                                                                                                    |                                                                                                                                                                                                                                                                                                                                                                                                                                                                                            |



|                    | INTERVENTIONS/ RECOMMENDATIONS DURING THE CRISIS                                                                                                                           |                                          |                                                                                          |                                           |                                                                                                                                                                                                                                                                                                                                                                                                                                                                                                                                                                                                                                   |
|--------------------|----------------------------------------------------------------------------------------------------------------------------------------------------------------------------|------------------------------------------|------------------------------------------------------------------------------------------|-------------------------------------------|-----------------------------------------------------------------------------------------------------------------------------------------------------------------------------------------------------------------------------------------------------------------------------------------------------------------------------------------------------------------------------------------------------------------------------------------------------------------------------------------------------------------------------------------------------------------------------------------------------------------------------------|
| First author, year | RESILIENCE                                                                                                                                                                 |                                          |                                                                                          |                                           |                                                                                                                                                                                                                                                                                                                                                                                                                                                                                                                                                                                                                                   |
|                    | Information (receiving for professionals)                                                                                                                                  | Information (providing by professionals) | Psychosocial support and treatment                                                       | Monitoring health status of professionals | Form and content of (psychosocial) support                                                                                                                                                                                                                                                                                                                                                                                                                                                                                                                                                                                        |
|                    | on risk of infection and related anxiety, specific topic that are relevant for the specific care for patients with SARS , protocols, use various forms                     |                                          | and support that are tailored to the social isolation or quarantine.                     |                                           |                                                                                                                                                                                                                                                                                                                                                                                                                                                                                                                                                                                                                                   |
| Raven, 2018        | open communication between held care workers, using social media platforms like WhatsApp, is helpful to cope with the impact of Ebola. it serves like kind of peer support |                                          | supportive supervision is an important source of being able to continue providing care   |                                           | Several important coping strategies based upon existing mechanisms included: being sustained by religion; a sense of serving their country and community; and peer and family support. Externally derived strategies included: training which built health worker confidence in providing care; provision of equipment to do their job safely; a social media platform which helped health workers deal with challenges; workshops that provided ways to deal with the stigma associated with being a health worker; and the risk allowance, which motivated staff to work in facilities and provided an additional income source |
| Shih, 2009         | Clear communication pathways are essential. Nurse leads need to be media say, distinguish adverse and supportive media fast. Provide tangible rewards                      |                                          |                                                                                          |                                           |                                                                                                                                                                                                                                                                                                                                                                                                                                                                                                                                                                                                                                   |
| Sin, 2004          | Executive/directive information important to help professionals to cope with the situation                                                                                 |                                          |                                                                                          |                                           | Availability of someone to talk to (ventilating concerns): supervisors or colleagues helps professionals to cope with the situation.                                                                                                                                                                                                                                                                                                                                                                                                                                                                                              |
| Son, 2019a         |                                                                                                                                                                            | Clear, accurate, and timely              | special program for their employees to share what they were emotionally experiencing and |                                           |                                                                                                                                                                                                                                                                                                                                                                                                                                                                                                                                                                                                                                   |

|                    | INTERVENTIONS/ RECOMMENDATIONS DURING THE CRISIS                                                                             |                                                                                                               |                                                                                                                                                                                                                                                                                                                                                                                      |                                                                                                                                           |                                                                                 |
|--------------------|------------------------------------------------------------------------------------------------------------------------------|---------------------------------------------------------------------------------------------------------------|--------------------------------------------------------------------------------------------------------------------------------------------------------------------------------------------------------------------------------------------------------------------------------------------------------------------------------------------------------------------------------------|-------------------------------------------------------------------------------------------------------------------------------------------|---------------------------------------------------------------------------------|
| First author, year | RESILIENCE                                                                                                                   |                                                                                                               |                                                                                                                                                                                                                                                                                                                                                                                      |                                                                                                                                           |                                                                                 |
|                    | Information (receiving for professionals)                                                                                    | Information (providing by professionals)                                                                      | Psychosocial support and treatment                                                                                                                                                                                                                                                                                                                                                   | Monitoring health status of professionals                                                                                                 | Form and content of (psychosocial) support                                      |
|                    |                                                                                                                              | communication is known to enable informed decision-making and cooperation within the hospital (on all levels) | issues that troubled them organised by center for empathy                                                                                                                                                                                                                                                                                                                            |                                                                                                                                           |                                                                                 |
| Son, 2019b         |                                                                                                                              |                                                                                                               | resilience-building programs with debriefing sessions and interdisciplinary effective communication that are focused on facilitating individuals' ability to cope with crises, relieving the intensity of the negative emotions adjusting the perceived level of risk and maintaining positivity (although better for non-healthcare workers, but also good for healthcare workers). |                                                                                                                                           |                                                                                 |
| Speroni, 2015a     | training of nurses and ancillary service staff to safely provide care for confirmed and/or PUI EVD patients                  |                                                                                                               |                                                                                                                                                                                                                                                                                                                                                                                      |                                                                                                                                           |                                                                                 |
| Speroni, 2015b     | Education, training, needed to ensure safe donning/doffing                                                                   |                                                                                                               |                                                                                                                                                                                                                                                                                                                                                                                      |                                                                                                                                           |                                                                                 |
| Styra, 2008        | Implementing systems for communication between healthcare workers and administration; confidence in the information provided |                                                                                                               | Involvement of occupational health experts                                                                                                                                                                                                                                                                                                                                           |                                                                                                                                           |                                                                                 |
| Tam, 2004          | Professionals needed clear guidelines.                                                                                       |                                                                                                               | Psychological support from employers.                                                                                                                                                                                                                                                                                                                                                | Monitor in order to detect symptoms early (sleep disturbance to reflect difficulties in adjusting with stress) to be able to act promptly | Professional counselling for frontline Healthcare workers should be promoted.   |
| von Strauss, 2017  | information adapted to the mission, to do lists, acts; in-depth information to give to family and colleagues                 |                                                                                                               | Professional counselling for frontline healthcare workers should be promoted.                                                                                                                                                                                                                                                                                                        |                                                                                                                                           |                                                                                 |
| Wong, 2005         |                                                                                                                              |                                                                                                               | the more frequently adopted coping strategies were acceptance, active coping, and positive framing                                                                                                                                                                                                                                                                                   |                                                                                                                                           | staff should be prepared psychologically to deal with potential stress by group |

|                    | INTERVENTIONS/ RECOMMENDATIONS DURING THE CRISIS                                                                                                                                                                                                                                                                                                                                                                                                                                                                                    |                                          |                                    |                                           |                                            |
|--------------------|-------------------------------------------------------------------------------------------------------------------------------------------------------------------------------------------------------------------------------------------------------------------------------------------------------------------------------------------------------------------------------------------------------------------------------------------------------------------------------------------------------------------------------------|------------------------------------------|------------------------------------|-------------------------------------------|--------------------------------------------|
| First author, year | RESILIENCE                                                                                                                                                                                                                                                                                                                                                                                                                                                                                                                          |                                          |                                    |                                           |                                            |
|                    | Information (receiving for professionals)                                                                                                                                                                                                                                                                                                                                                                                                                                                                                           | Information (providing by professionals) | Psychosocial support and treatment | Monitoring health status of professionals | Form and content of (psychosocial) support |
|                    |                                                                                                                                                                                                                                                                                                                                                                                                                                                                                                                                     |                                          |                                    |                                           | interviews before going into SARS wards    |
| Wu, 2008           | Too much exposure to media coverage during crisis increase risk for alcohol abuse                                                                                                                                                                                                                                                                                                                                                                                                                                                   |                                          |                                    |                                           |                                            |
| Wu, 2009           | Altruistic acceptance of risk is negatively related to PTSS.                                                                                                                                                                                                                                                                                                                                                                                                                                                                        |                                          |                                    |                                           |                                            |
| Xiao, 2020         | Establish psychotherapy teams as early as possible: Pro-actively evaluate anxiety, stress and sleep quality and provide individually targeted interventions                                                                                                                                                                                                                                                                                                                                                                         |                                          |                                    |                                           |                                            |
| Bhagavathula, 2020 | Updates posted online by official government health authorities had positive implications for improving healthcare workers' knowledge levels; Social media as a source of information with unverified malicious information, can spread quickly and can misguide healthcare workers. Healthcare workers should carefully evaluate COVID-19-related information and should use scientific and authentic content as information sources. Educational campaigns that target healthcare workers and the wider population are necessary. |                                          |                                    |                                           |                                            |
| Zhu, 2020          | Online relaxation techniques. 5.0 % of Health care workers joined in suggesting more psychosocial interventions and follow-up programs are needed. The risk of anxiety, depression, and acute stress tended to                                                                                                                                                                                                                                                                                                                      |                                          |                                    |                                           |                                            |

|                    | INTERVENTIONS/ RECOMMENDATIONS DURING THE CRISIS |                                          |                                                                                                                                                                                                                                                                                                                                                                                                                                                                                                                                         |                                                                                                                                                                        |                                                                                                                                                                                                                                         |
|--------------------|--------------------------------------------------|------------------------------------------|-----------------------------------------------------------------------------------------------------------------------------------------------------------------------------------------------------------------------------------------------------------------------------------------------------------------------------------------------------------------------------------------------------------------------------------------------------------------------------------------------------------------------------------------|------------------------------------------------------------------------------------------------------------------------------------------------------------------------|-----------------------------------------------------------------------------------------------------------------------------------------------------------------------------------------------------------------------------------------|
| First author, year | RESILIENCE                                       |                                          |                                                                                                                                                                                                                                                                                                                                                                                                                                                                                                                                         |                                                                                                                                                                        |                                                                                                                                                                                                                                         |
|                    | Information (receiving for professionals)        | Information (providing by professionals) | Psychosocial support and treatment                                                                                                                                                                                                                                                                                                                                                                                                                                                                                                      | Monitoring health status of professionals                                                                                                                              | Form and content of (psychosocial) support                                                                                                                                                                                              |
|                    |                                                  |                                          | increase with increasing years of work; Psychological intervention strategies according to different risk levels of HWs. Keep track of the mental status of those HWs who were confirmed or suspected patients themselves or suspected patients in their family; the exercise habit was associated with a lower risk of anxiety symptoms, suggesting that physical activity helps alleviate psychological impact. HWs in isolation wards have a more pronounced risk of stress.                                                         |                                                                                                                                                                        |                                                                                                                                                                                                                                         |
| Huang, 2020        |                                                  |                                          | Women have significantly higher levels of depression, anxiety, and loneliness than men (related to gender traits); Hospitals should focus on providing psychological support to nurses; providing timely psychological assistance; training in coping strategies; providing adequate medical protective equipment.                                                                                                                                                                                                                      |                                                                                                                                                                        | Taking a variety of interventions to block the spread of infectious diseases to form a medical environment where COVID-19 stops spreading in hospitals. Create an optimistic environment and guarantees for personal safety for nurses. |
| Liu, 2020          |                                                  |                                          | Compliment medical personnel for their dedication in fighting COVID-19, which could encourage medical workers and make them feel honoured and proud to participate in this difficult mission, authorities should also focus on implementing measures to target workers' mental health; government and healthcare authorities should proactively implement appropriate measures, such as providing psychological counselling services, to prevent, alleviate or treat increased anxiety among medical staff during the COVID-19 epidemic | Governments should focus on potential psychological problems among suspect cases in medical staff, and provide effective mental health measures to alleviate suffering |                                                                                                                                                                                                                                         |
| Qi, 2020           |                                                  |                                          | Interventions should be administrated for frontline medical workers aiming to maintain their healthy condition and guarantee their professional performance. Exposure to long working hours and irregular work shifts may attribute to stress, fatigue and chronic diseases                                                                                                                                                                                                                                                             |                                                                                                                                                                        |                                                                                                                                                                                                                                         |
| Khee, 2004         |                                                  |                                          |                                                                                                                                                                                                                                                                                                                                                                                                                                                                                                                                         |                                                                                                                                                                        | Group sessions seemed helpful; they brought upon a                                                                                                                                                                                      |

|                    | INTERVENTIONS/ RECOMMENDATIONS DURING THE CRISIS |                                                                                                                                                                                                                                                                                                                                                                                           |                                                                                                                                                                                                                                                                                                                                          |                                                                                                                                                                                            |
|--------------------|--------------------------------------------------|-------------------------------------------------------------------------------------------------------------------------------------------------------------------------------------------------------------------------------------------------------------------------------------------------------------------------------------------------------------------------------------------|------------------------------------------------------------------------------------------------------------------------------------------------------------------------------------------------------------------------------------------------------------------------------------------------------------------------------------------|--------------------------------------------------------------------------------------------------------------------------------------------------------------------------------------------|
| First author, year | RESILIENCE                                       |                                                                                                                                                                                                                                                                                                                                                                                           |                                                                                                                                                                                                                                                                                                                                          |                                                                                                                                                                                            |
|                    | Information (receiving for professionals)        | Information (providing by professionals)                                                                                                                                                                                                                                                                                                                                                  | Psychosocial support and treatment                                                                                                                                                                                                                                                                                                       | Monitoring health status of professionals                                                                                                                                                  |
|                    |                                                  |                                                                                                                                                                                                                                                                                                                                                                                           |                                                                                                                                                                                                                                                                                                                                          | Form and content of (psychosocial) support<br>source of mutual support and also understanding among all which greatly impacted the overall strategies utilized in the battle against SARS. |
| WHO, 2019          |                                                  | A blame-free environment in which health workers can report on incidents; report to their immediate supervisor any situation which they have reasonable justification to believe presents an imminent and serious danger to life or health; advise management if health workers are experiencing signs of undue stress or mental health challenges that require supportive interventions. | Allow health workers to exercise the right to remove themselves from a work situation that they have reasonable justification to believe presents an imminent and serious danger to their life or health and protect health workers exercising this right from any undue consequences; access to mental health and counselling resources |                                                                                                                                                                                            |

**Table 3: Interventions/ recommendations during the crisis: tasks and responsibilities & working conditions**

|                    | INTERVENTIONS / RECOMMENDATIONS DURING THE CRISIS                  |                                                                                                                                                                  |              |                                                                                                                                           |               |                            |                                                                                                                                                                                                                |                           |              |                              |
|--------------------|--------------------------------------------------------------------|------------------------------------------------------------------------------------------------------------------------------------------------------------------|--------------|-------------------------------------------------------------------------------------------------------------------------------------------|---------------|----------------------------|----------------------------------------------------------------------------------------------------------------------------------------------------------------------------------------------------------------|---------------------------|--------------|------------------------------|
| First author, year | TASKS AND RESPONSIBILITIES                                         |                                                                                                                                                                  |              | WORKING CONDITIONS                                                                                                                        |               |                            |                                                                                                                                                                                                                |                           |              |                              |
|                    | Tasks / responsibilities / task mix                                | Intensity / weigh of tasks and responsibilities                                                                                                                  | Work pattern | Team composition                                                                                                                          | Team building | Open and safe work culture | Rooms and facilities                                                                                                                                                                                           | Availability of materials | Compensation | Possibility to eat and drink |
| Al-Dorzi, 2016     | A nurse was assigned to screen all staff and visitors on symptoms. | The nurse-to-patient ratio was mostly 1:1, except for one patient on ECMO (2:1). Also, 1-2 additional nurses were deployed in each unit to assist in procedures. |              | Rotating residents were not allowed to work in the ICU (only attending staff). Two pregnant ICU nurses were redeployed to low-risk units. |               |                            |                                                                                                                                                                                                                |                           |              |                              |
| Bai, 2004          |                                                                    |                                                                                                                                                                  |              |                                                                                                                                           |               |                            | Provide suitable accommodation to health professionals who are concerned about infecting loved ones. Yet, staff in quarantine has a higher risk on acute stress and early termination of working in healthcare |                           |              |                              |
| Belfroid, 2018     |                                                                    |                                                                                                                                                                  |              | Use of buddies to put on and check protective                                                                                             |               |                            |                                                                                                                                                                                                                |                           |              |                              |

|                    | INTERVENTIONS / RECOMMENDATIONS DURING THE CRISIS                                                                                           |                                                                                                                    |                                                                           |                                  |                                                                                                                   |                                                                                      |                      |                           |                                           |                              |
|--------------------|---------------------------------------------------------------------------------------------------------------------------------------------|--------------------------------------------------------------------------------------------------------------------|---------------------------------------------------------------------------|----------------------------------|-------------------------------------------------------------------------------------------------------------------|--------------------------------------------------------------------------------------|----------------------|---------------------------|-------------------------------------------|------------------------------|
| First author, year | TASKS AND RESPONSIBILITIES                                                                                                                  |                                                                                                                    |                                                                           | WORKING CONDITIONS               |                                                                                                                   |                                                                                      |                      |                           |                                           |                              |
|                    | Tasks / responsibilities / task mix                                                                                                         | Intensity / weigh of tasks and responsibilities                                                                    | Work pattern                                                              | Team composition                 | Team building                                                                                                     | Open and safe work culture                                                           | Rooms and facilities | Availability of materials | Compensation                              | Possibility to eat and drink |
|                    |                                                                                                                                             |                                                                                                                    |                                                                           | equipment are highly appreciated |                                                                                                                   |                                                                                      |                      |                           |                                           |                              |
| Chan, 2005         |                                                                                                                                             | Work allocation and scheduling should be reviewed to relieve nurses' stress.                                       | Vacation leave may have to be granted to some needy nurses.               |                                  |                                                                                                                   |                                                                                      |                      |                           |                                           |                              |
| Chen, 2005         |                                                                                                                                             |                                                                                                                    |                                                                           |                                  |                                                                                                                   |                                                                                      |                      |                           | Adequate compensation (for work and risk) |                              |
| Chen, 2007         |                                                                                                                                             | Total number of hours of care might be a significant predictor of mental health (reasonable duty schedules needed) | Shifts: 1-2 week of care; 2 weeks of self-quarantine and 2 weeks of duty. |                                  |                                                                                                                   | Discrimination against Healthcare workers (because of their work with SARS patients) |                      |                           |                                           |                              |
| Chen, 2006         |                                                                                                                                             |                                                                                                                    | Rescheduling holidays for sufficient rest time                            |                                  |                                                                                                                   |                                                                                      |                      |                           |                                           |                              |
| Gearing, 2007      | Significant/leading role of social workers in interdisciplinary teams to support hospital staff, and patients and their families (positive) |                                                                                                                    |                                                                           |                                  |                                                                                                                   |                                                                                      |                      |                           |                                           |                              |
| Grace, 2005        |                                                                                                                                             |                                                                                                                    |                                                                           |                                  | support or discussion group through the use of web-based technology; talking to others/increased collegiality and |                                                                                      |                      |                           |                                           |                              |

| INTERVENTIONS / RECOMMENDATIONS DURING THE CRISIS |                                     |                                                 |                    |                  |                                                                                                                                                                                              |                                                                                                                                                                                                                                                                                                                                                                                                                                                                     |                      |                           |                                                                                                                                         |                              |
|---------------------------------------------------|-------------------------------------|-------------------------------------------------|--------------------|------------------|----------------------------------------------------------------------------------------------------------------------------------------------------------------------------------------------|---------------------------------------------------------------------------------------------------------------------------------------------------------------------------------------------------------------------------------------------------------------------------------------------------------------------------------------------------------------------------------------------------------------------------------------------------------------------|----------------------|---------------------------|-----------------------------------------------------------------------------------------------------------------------------------------|------------------------------|
| First author, year                                | TASKS AND RESPONSIBILITIES          |                                                 | WORKING CONDITIONS |                  |                                                                                                                                                                                              |                                                                                                                                                                                                                                                                                                                                                                                                                                                                     |                      |                           |                                                                                                                                         |                              |
|                                                   | Tasks / responsibilities / task mix | Intensity / weigh of tasks and responsibilities | Work pattern       | Team composition | Team building                                                                                                                                                                                | Open and safe work culture                                                                                                                                                                                                                                                                                                                                                                                                                                          | Rooms and facilities | Availability of materials | Compensation                                                                                                                            | Possibility to eat and drink |
|                                                   |                                     |                                                 |                    |                  | teamwork→ camaraderie, courage, professionalism, dedication to patient care, altruism, cooperation, mutual support, unity in a common cause, the spirit of pulling together through a crisis |                                                                                                                                                                                                                                                                                                                                                                                                                                                                     |                      |                           |                                                                                                                                         |                              |
| Jeong-Sil, 2018                                   |                                     |                                                 |                    |                  |                                                                                                                                                                                              | need for social support to encourage healthcare workers to stay committed to patient care while struggling with infectious diseases → provide accurate information (by gov.) to prevent vague public fear which could lead to misunderstanding and prejudice against healthcare workers. In terms of stigmatization regarding medical staff: social phenomenon of people avoiding not only hospital healthcare workers but also their families in fear of infection |                      |                           | Respect the autonomy of nurses: provide sufficient compensation and safety mechanisms to facilitate their participation in patient care |                              |



|                    | INTERVENTIONS / RECOMMENDATIONS DURING THE CRISIS                                                                               |                                                             |                                                                        |                                                                          |                                                                                           |                                                                                                                                                                                                                         |                                                                                                                  |                                                                        |                              |                                                                                                                   |
|--------------------|---------------------------------------------------------------------------------------------------------------------------------|-------------------------------------------------------------|------------------------------------------------------------------------|--------------------------------------------------------------------------|-------------------------------------------------------------------------------------------|-------------------------------------------------------------------------------------------------------------------------------------------------------------------------------------------------------------------------|------------------------------------------------------------------------------------------------------------------|------------------------------------------------------------------------|------------------------------|-------------------------------------------------------------------------------------------------------------------|
| First author, year | TASKS AND RESPONSIBILITIES                                                                                                      |                                                             | WORKING CONDITIONS                                                     |                                                                          |                                                                                           |                                                                                                                                                                                                                         |                                                                                                                  |                                                                        |                              |                                                                                                                   |
|                    | Tasks / responsibilities / task mix                                                                                             | Intensity / weigh of tasks and responsibilities             | Work pattern                                                           | Team composition                                                         | Team building                                                                             | Open and safe work culture                                                                                                                                                                                              | Rooms and facilities                                                                                             | Availability of materials                                              | Compensation                 | Possibility to eat and drink                                                                                      |
| Kang, 2018         |                                                                                                                                 | Be aware of burnout over time because of the heavy workload |                                                                        |                                                                          |                                                                                           |                                                                                                                                                                                                                         |                                                                                                                  |                                                                        |                              |                                                                                                                   |
| Lai, 2020          | Pressure on nurses when they were assigned to join the SARS team (negative)                                                     |                                                             |                                                                        |                                                                          |                                                                                           |                                                                                                                                                                                                                         |                                                                                                                  |                                                                        |                              |                                                                                                                   |
| Lee, 2005          | Senior nurses mentoring the junior nurses.                                                                                      |                                                             | Reasonable staffing/shift                                              | Pressure on (some) nurses when they were assigned to join the SARS team. | Importance of meetings to improve teamwork and reduce conflict between doctors and nurses | Conflict between their duty and their own safety in the workplace; Nurses suffered from stresses related to worries about colleagues, patients and family members. Death of the head nurse as a major stressor. (GRIEF) | Tension (because of limited availability of rooms/bed etc.) between doctors and nurses hurting the relationship. | Having adequate and sufficient protective equipment is most important. | Bonus pay for dangerous work | Engaged health promoting behaviours (more rest, exercise and balanced diet). Part of coping strategies of nurses. |
| Lehmann, 2016      |                                                                                                                                 |                                                             | Shorter shift durations (<12 hours) may entail lower levels of fatigue |                                                                          |                                                                                           |                                                                                                                                                                                                                         |                                                                                                                  |                                                                        |                              |                                                                                                                   |
| Li, 2020           | Adopt various levels of interventions for frontline nurses during the diverse stages of medical support for patients (positive) |                                                             |                                                                        |                                                                          |                                                                                           |                                                                                                                                                                                                                         |                                                                                                                  |                                                                        |                              |                                                                                                                   |
| Liu, 2019          |                                                                                                                                 |                                                             | Reasonable shift arrangements were adopted to avoid                    |                                                                          |                                                                                           |                                                                                                                                                                                                                         |                                                                                                                  |                                                                        |                              |                                                                                                                   |

| INTERVENTIONS / RECOMMENDATIONS DURING THE CRISIS |                                                                                                                                                                                             |                                                 |                                                                                                                           |                                                                                                                                                                                                                        |                                                                    |                                                                                                                                                        |                                                                                         |                                                                                                                     |                                                                                                                                                                           |                                                                                                           |
|---------------------------------------------------|---------------------------------------------------------------------------------------------------------------------------------------------------------------------------------------------|-------------------------------------------------|---------------------------------------------------------------------------------------------------------------------------|------------------------------------------------------------------------------------------------------------------------------------------------------------------------------------------------------------------------|--------------------------------------------------------------------|--------------------------------------------------------------------------------------------------------------------------------------------------------|-----------------------------------------------------------------------------------------|---------------------------------------------------------------------------------------------------------------------|---------------------------------------------------------------------------------------------------------------------------------------------------------------------------|-----------------------------------------------------------------------------------------------------------|
| First author, year                                | TASKS AND RESPONSIBILITIES                                                                                                                                                                  |                                                 | WORKING CONDITIONS                                                                                                        |                                                                                                                                                                                                                        |                                                                    |                                                                                                                                                        |                                                                                         |                                                                                                                     |                                                                                                                                                                           |                                                                                                           |
|                                                   | Tasks / responsibilities / task mix                                                                                                                                                         | Intensity / weigh of tasks and responsibilities | Work pattern                                                                                                              | Team composition                                                                                                                                                                                                       | Team building                                                      | Open and safe work culture                                                                                                                             | Rooms and facilities                                                                    | Availability of materials                                                                                           | Compensation                                                                                                                                                              | Possibility to eat and drink                                                                              |
|                                                   |                                                                                                                                                                                             |                                                 | fatigue at work                                                                                                           |                                                                                                                                                                                                                        |                                                                    |                                                                                                                                                        |                                                                                         |                                                                                                                     |                                                                                                                                                                           |                                                                                                           |
| Maunder, 2004a                                    |                                                                                                                                                                                             |                                                 |                                                                                                                           |                                                                                                                                                                                                                        |                                                                    | Reassurance of healthcare workers that their livelihood is not at risk if they are not able to work owing to illness or infection control precautions. |                                                                                         | Adequate supplies of personal protection equipment.                                                                 |                                                                                                                                                                           |                                                                                                           |
| Maunder, 2004b                                    | Being assigned to unfamiliar tasks (negative). Doing work within usual area of competence and expertise (positive).                                                                         |                                                 |                                                                                                                           |                                                                                                                                                                                                                        | Perceived stigma and disrupted contact with colleagues (negative). |                                                                                                                                                        |                                                                                         | Positive view on protective equipment and hospital procedures and resources (positive).                             |                                                                                                                                                                           |                                                                                                           |
| Maunder, 2006                                     | Opportunities for healthcare workers to contribute to decision-making in the workplace.                                                                                                     |                                                 |                                                                                                                           |                                                                                                                                                                                                                        |                                                                    |                                                                                                                                                        |                                                                                         |                                                                                                                     |                                                                                                                                                                           |                                                                                                           |
| Maunder, 2003                                     | Staff members not involved in patient care were deemed non-essential and asked to stay at home > felt isolated and ineffective (= negative). Rather redeployed roles, felt more satisfying. |                                                 | Blurred line between staff and patients > caring for colleagues increased anxiety of competences and skills (= negative). | - Senior staff acting as role models by making use of support services and bringing others with them.<br>- Efforts to overcome interpersonal isolation, from sharing jokes on the nursing station to conference calls. |                                                                    |                                                                                                                                                        | A drop-in lounge in an open setting with soothing music, comfortable chairs and snacks. | Being well-equipped, maximally protected by isolation precautions. Provision of appropriate equipment and supplies. | Staff were prevented by provincial directives from working in multiple institutions, which imposed a financial burden on staff whose income depends on working in several | Eating and drinking, which require removing a mask, were done alone or outside the hospital (= negative). |

| INTERVENTIONS / RECOMMENDATIONS DURING THE CRISIS |                                     |                                                                                                                                            |                    |                                                        |                                                                                                                                                                                                                                                   |                                                                                                              |                                                                            |                                                                       |                                                                  |                                                    |
|---------------------------------------------------|-------------------------------------|--------------------------------------------------------------------------------------------------------------------------------------------|--------------------|--------------------------------------------------------|---------------------------------------------------------------------------------------------------------------------------------------------------------------------------------------------------------------------------------------------------|--------------------------------------------------------------------------------------------------------------|----------------------------------------------------------------------------|-----------------------------------------------------------------------|------------------------------------------------------------------|----------------------------------------------------|
| First author, year                                | TASKS AND RESPONSIBILITIES          |                                                                                                                                            | WORKING CONDITIONS |                                                        |                                                                                                                                                                                                                                                   |                                                                                                              |                                                                            |                                                                       |                                                                  |                                                    |
|                                                   | Tasks / responsibilities / task mix | Intensity / weigh of tasks and responsibilities                                                                                            | Work pattern       | Team composition                                       | Team building                                                                                                                                                                                                                                     | Open and safe work culture                                                                                   | Rooms and facilities                                                       | Availability of materials                                             | Compensation institutions (= negative).                          | Possibility to eat and drink                       |
| O'Boyle, 2006                                     |                                     | Triage system to process patients based on acuity and ethical principles (positive)                                                        |                    | novice nurses work with senior nurse to enhance safety |                                                                                                                                                                                                                                                   | increased security to protect nurses and commitment from institutions to take care of ill or injured nurses. | a quiet area as respite from the clinical environment and a place to sleep | methods to protect themselves, their families and patients is crucial | a system to prepare and compensate for potentially loss of staff | Food and water necessary for continued functioning |
| O'Sullivan, 2009                                  |                                     | Awareness of feelings of guilt due to personal (e.g. fear to infect others) and professional (e.g. obligation to work) dilemmas (positive) |                    |                                                        |                                                                                                                                                                                                                                                   |                                                                                                              |                                                                            |                                                                       |                                                                  |                                                    |
| Smith, 2017                                       | Successful patient care (positive)  |                                                                                                                                            |                    |                                                        | behavioural health worker available for counselling services and informal conversations/positive team environment/Discussion on mental health focused on compassion fatigue; personal interest; group training activities; informal conversations |                                                                                                              |                                                                            |                                                                       |                                                                  |                                                    |
| Son, 2019a                                        |                                     |                                                                                                                                            |                    |                                                        |                                                                                                                                                                                                                                                   |                                                                                                              |                                                                            | For a safe environment: providing appropriate protection measures for |                                                                  |                                                    |

| INTERVENTIONS / RECOMMENDATIONS DURING THE CRISIS |                                     |                                                 |                    |                  |                                                                                                                                                                            |                            |                      |                                                                                                               |                                                                      |                              |
|---------------------------------------------------|-------------------------------------|-------------------------------------------------|--------------------|------------------|----------------------------------------------------------------------------------------------------------------------------------------------------------------------------|----------------------------|----------------------|---------------------------------------------------------------------------------------------------------------|----------------------------------------------------------------------|------------------------------|
| First author, year                                | TASKS AND RESPONSIBILITIES          |                                                 | WORKING CONDITIONS |                  |                                                                                                                                                                            |                            |                      |                                                                                                               |                                                                      |                              |
|                                                   | Tasks / responsibilities / task mix | Intensity / weigh of tasks and responsibilities | Work pattern       | Team composition | Team building                                                                                                                                                              | Open and safe work culture | Rooms and facilities | Availability of materials                                                                                     | Compensation                                                         | Possibility to eat and drink |
|                                                   |                                     |                                                 |                    |                  |                                                                                                                                                                            |                            |                      | hospital workers and their families                                                                           |                                                                      |                              |
| Son, 2019b                                        |                                     |                                                 |                    |                  |                                                                                                                                                                            |                            |                      | providing protection (e.g., vaccines, protective clothing), especially healthcare workers to build resilience |                                                                      |                              |
| Speroni, 2015b                                    |                                     |                                                 |                    |                  |                                                                                                                                                                            |                            |                      | space for voluntarily caring for patients with external ventricular drains; possibility to opt out            | Specialized teams/trained staff with proper techniques and equipment |                              |
| Styra, 2008                                       |                                     |                                                 |                    |                  | buddy system (pairing an experienced healthcare workers with a less experienced healthcare worker); opportunities for healthcare workers to exchange and address concerns, |                            |                      |                                                                                                               |                                                                      |                              |

|                    | INTERVENTIONS / RECOMMENDATIONS DURING THE CRISIS                                                            |                                                                                        |              |                                      |                                                     |                                                                                                                                                                                                                                                                |                      |                                                                                                              |                                                     |                              |
|--------------------|--------------------------------------------------------------------------------------------------------------|----------------------------------------------------------------------------------------|--------------|--------------------------------------|-----------------------------------------------------|----------------------------------------------------------------------------------------------------------------------------------------------------------------------------------------------------------------------------------------------------------------|----------------------|--------------------------------------------------------------------------------------------------------------|-----------------------------------------------------|------------------------------|
| First author, year | TASKS AND RESPONSIBILITIES                                                                                   |                                                                                        |              | WORKING CONDITIONS                   |                                                     |                                                                                                                                                                                                                                                                |                      |                                                                                                              |                                                     |                              |
|                    | Tasks / responsibilities / task mix                                                                          | Intensity / weigh of tasks and responsibilities                                        | Work pattern | Team composition<br>share strategies | Team building                                       | Open and safe work culture                                                                                                                                                                                                                                     | Rooms and facilities | Availability of materials                                                                                    | Compensation                                        | Possibility to eat and drink |
| Tam, 2004          | Willingness to work on SARS units might prepare healthcare workers better to cope with psychological stress. |                                                                                        |              |                                      | Adequate effective team communication and feedback. | Avoiding close social contact (transmitting infection) was increasing stress of healthcare workers. Providing a safe and well-structured work environment will minimize the acute stress effect & will foster resilience of health care workers' mental status |                      | Worries that protective measures were inadequate (more than worries about direct exposure to SARS patients). | Adequate practical support: insurance, compensation |                              |
| von Strauss, 2017  | need for practical exercises specific for the task                                                           | Reduction of workload (positive)                                                       |              |                                      |                                                     | Healthcare worker needed to be "altruistic and brave"                                                                                                                                                                                                          |                      |                                                                                                              |                                                     |                              |
| Wu, 2008           |                                                                                                              | Awareness of long lasting mental health consequences, such as alcohol abuse (positive) |              |                                      |                                                     | Being quarantined during the crisis increased the risk for alcohol abuse                                                                                                                                                                                       |                      |                                                                                                              |                                                     |                              |
| Wu, 2009           |                                                                                                              | Awareness of long lasting mental health consequences, such as alcohol abuse (positive) |              |                                      |                                                     | Being quarantined during the crisis increased the risk for post-traumatic stress syndrome                                                                                                                                                                      |                      |                                                                                                              |                                                     |                              |
| WHO, 2018          | Advanced task planning (positive)                                                                            |                                                                                        |              |                                      |                                                     |                                                                                                                                                                                                                                                                |                      |                                                                                                              |                                                     |                              |

| INTERVENTIONS / RECOMMENDATIONS DURING THE CRISIS |                                     |                                                 |                                                |                  |               |                            |                      |                                        |                                                                               |                              |
|---------------------------------------------------|-------------------------------------|-------------------------------------------------|------------------------------------------------|------------------|---------------|----------------------------|----------------------|----------------------------------------|-------------------------------------------------------------------------------|------------------------------|
| First author, year                                | TASKS AND RESPONSIBILITIES          |                                                 | WORKING CONDITIONS                             |                  |               |                            |                      |                                        |                                                                               |                              |
|                                                   | Tasks / responsibilities / task mix | Intensity / weigh of tasks and responsibilities | Work pattern                                   | Team composition | Team building | Open and safe work culture | Rooms and facilities | Availability of materials              | Compensation                                                                  | Possibility to eat and drink |
| WHO, 2019                                         |                                     |                                                 | maintain appropriate working hours with breaks |                  |               |                            |                      | An adequate supply of protective gear. | Medical coverage for all medical personnel and their families was imperative. | Sufficient food.             |
